# Supplementary material
Source: Springer Nature journal article supplement (https://www.springermedizin.de/resource/supplementary/12889_2012_5441_MOESM2_ESM.pdf/9495286)
Supplement: MOESM2 [file 9495286]

# HIV Epidemic Stage

Criminalization, Punitive Drug Laws, Drug Treatment Policies  
Human Rights Contexts, Legality of needle exchange,  
Legality of MAT

Needle and Syringe Exchange Availability, Medically Assisted Therapy Availability  
VCT Access, ARV Access, Safe Drug Consumption Sites

HIV Prevalence, HIV Transmission Knowledge, Uptake of harm reduction services  
Dual Risk sex workers or MSM in network

Needle sharing, incarceration/detention frequent injecting,  
cocaine injection, trading sex for drugs,  
unprotected vaginal, anal sex

## Level of Risks

Stage of Epidemic

Public Policy

Community

Network

Individual

Legend: VCT (voluntary counselling and testing); ARV (anti retro-viral); MSM (men who have sex with men); MAT (methadone assisted treatment)
